# Supplementary material for: Excessively High Hydration Volume May Not Be Associated With Decreased Risk of Contrast‐Induced Acute Kidney Injury After Percutaneous Coronary Intervention in Patients With Renal Insufficiency
Source: PubMed Central journal article supplement — J Am Heart Assoc. 2016 May 27;5(6):e003171. doi: 10.1161/JAHA.115.003171 (PMC4937263; doi:10.1161/jaha.115.003171), 2016-05-27
Supplement: JAH3-5-e003171-s001.pdf [file JAH3-5-e003171-s001.pdf]

**SUPPLEMENTAL MATERIAL**

**Table S1.** Univariate analyses and multivariate associations between AHF and HV/W

quartiles

| Risk factors             | Univariate logistic regression |             |         | Multivariate logistic regression |            |         |
|--------------------------|--------------------------------|-------------|---------|----------------------------------|------------|---------|
|                          | OR                             | 95% CI      | p-value | OR                               | 95% CI     | p-value |
| HV/W ratio Q2 vs. Q1     | 8.14                           | 1.01–65.42  | 0.049   | 5.97                             | 0.73–48.88 | 0.096   |
| HV/W ratio Q3 vs. Q1     | 9.80                           | 1.25–76.98  | 0.030   | 5.90                             | 0.73–47.68 | 0.096   |
| HV/W ratio Q4 vs. Q1     | 18.42                          | 2.44–139.23 | 0.005   | 9.90                             | 1.27–77.12 | 0.029   |
| Age, years               | 1.05                           | 1.02–1.09   | 0.004   | 1.02                             | 0.98–1.06  | 0.302   |
| Congestive heart failure | 13.01                          | 6.19–27.34  | 0.000   | 10.62                            | 5.00–22.56 | 0.000   |
| Hypertension             | 1.72                           | 0.80–3.70   | 0.161   | 1.61                             | 0.73–3.58  | 0.241   |

AHF = acute heart failure; HV/W = ratio of hydration volume to body weight; OR = odds ratio; CI = confidence interval; Q = quartile.

**Table S2.** Univariate analyses and multivariate associations between AHF and HV/W >25 mL/kg

| Risk factors             | Univariate logistic regression |            |         | Multivariate logistic regression |            |         |
|--------------------------|--------------------------------|------------|---------|----------------------------------|------------|---------|
|                          | OR                             | 95% CI     | p-value | OR                               | 95% CI     | p-value |
| HV/W ratio >25 mL/kg     | 3.18                           | 1.42–7.14  | 0.005   | 2.15                             | 0.91–5.09  | 0.081   |
| Age, years               | 1.05                           | 1.02–1.09  | 0.004   | 1.03                             | 0.99–1.07  | 0.150   |
| Congestive heart failure | 13.01                          | 6.19–27.34 | 0.000   | 11.54                            | 5.43–24.52 | 0.000   |
| Hypertension             | 1.72                           | 0.80–3.70  | 0.161   | 1.49                             | 0.67–3.31  | 0.322   |

AHF = acute heart failure; HV/W = ratio of hydration volume to body weight; OR = odds ratio; CI = confidence interval.
